# Supplementary material
Source: PubMed Central journal article supplement (PMC5865436)
Supplement: 2017_175349-Disclosures_and_Contributions.pdf [file 2017_175349-Disclosures_and_Contributions.pdf]

Haematologica  
HAEMATOL/2017/175349  
Version 4

The prohibitin-binding compound fluorizoline induces apoptosis in chronic lymphocytic leukemia cells ex vivo but fails to prevent leukemia development in a murine model

Marina Wierz, Sandrine Pierson, Nora Chouha, Laurent Désaubry, Jean-Hugues François, Guy Berchem, Jerome Paggetti, and Etienne Moussay

Disclosures: The authors disclose no conflict of interest.

Contributions: J.P. and E.M. designed the study. M.W. and S.P. performed all experiments. M.W., J.P., and E.M. analyzed data, prepared the figures, and wrote the paper. N.C. and L.D. synthesized fluorizoline. GB and J.H.F provided patient samples. All authors revised the manuscript.
